# Supplementary material for: A comparison of the effects of medical Qigong and standard exercise therapy on symptoms and quality of life in patients with advanced cancer
Source: Springer Nature journal article supplement (doi:10.1007/s00520-017-3579-x), 2017-01-19
Supplement: MOESM3 [file 12007856]

**Table S1.** Baseline characteristics of 19 patients who completed both exercise interventions

|  |  | Exercise Intervention | |  |
| --- | --- | --- | --- | --- |
|  |  |  |  |  |
|  |  | QG | SET | *P* |
| N |  | 9 | 10 |  |
| Age (yrs) | mean(SD) | 64.3 (12.1) | 63.9 (7.9) | 0.94 |
| Sex | F/M | 4/5 | 4/6 | 1.0 |
| PS | 0/1 | 1/8 | 2/8 | 1.0 |
| Tumour type | GI/Lung | 3/6 | 7/3 | 0.18 |
| Stage | III/IV | 3/6 | 4/6 | 1.0 |
|  |  |  |  |  |
| Chemotherapy line number | 0/1/2/≥3 | 2/4/1/2 | 1/4/2/3 | NA |
| Currently on chemotherapy? | N/Y | 3/6 | 2/8 | 0.63 |
| Current chemotherapy type | A/B/C/NA | 5/0/1/3 | 8/0/0/2 | NA |
|  |  |  |  |  |
| Status at follow up | Alive/Dead | 4/5 | 4/6 | 1.0 |
| Survival (weeks) | median | 64.9 | 91.0 | 0.82 |

Notes: Current chemotherapy type: A = intravenous (i.v.) chemotherapy with two or more agents, B = i.v. chemotherapy with single agent, C = oral anti-cancer treatment. *P*-value comparing QG and SET using: Student’s t-test for means, Fisher’s exact test for categorical data, log-rank test for comparison of median survival estimates.
